# Supplementary material
Source: PubMed Central journal article supplement (PMC7493703)
Supplement: NIHMS1624133-supplement-1.pdf [file NIHMS1624133-supplement-1.pdf]

## Supplementary Methods

### *DNA Extraction and Genotyping*

Genomic DNA was extracted from peripheral whole blood in patients of both cohorts, with the exception of 21 patients' formalin-fixed paraffin-embedded tissues from the evaluation cohort using the QIAmp Kit (Qiagen, Germantown, MD), according to the manufacturer's protocol. The candidate SNPs were tested with PCR-based direct DNA sequence analysis using the ABI 3100A Capillary Genetic Analyzer and Sequencing Scanner v1.0 (Thermo Fisher Scientific, Waltham, MA). The forward and reverse primers used for amplification of extracted DNA are listed in [Supplemental Table 1](#). For quality control purposes, a randomly selected 10% of the samples was analyzed by direct DNA sequencing for each SNP, resulting in a genotype concordance rate of 99% or more. The investigators analyzing the SNPs were blinded to the clinical data.

### *Analysis of Serum VEGF-A and CCL5 Levels*

Separated serum was stored at  $-80^{\circ}\text{C}$ . The serum levels of VEGF-A and *CCL5* were measured using Quantikine ELISA kits (R&D Systems, Minneapolis, MN). A portion of the data has been previously reported, showing associations between serum cytokine levels and efficacy as well as toxicity of regorafenib.<sup>5</sup> In the current study, the genetic functionality of the candidate SNPs was first analyzed retrospectively to investigate the relationship between serum cytokine levels and genotypes during regorafenib treatment.

### *Statistical Analysis*

PFS was defined as the interval between the date of starting treatment and the date of confirmed disease progression or death. The data of patients without disease progression or death were censored at the date of last follow-up. OS was calculated from the date of starting treatment until the date of death from any cause. In patients who were lost to follow-up, data were censored at the date of last follow-up. Disease control rate was defined as the proportion of patients who achieved a complete response, partial response, or stable disease according to Response Evaluation Criteria in Solid Tumors v1.1. The chi-square test or Wilcoxon test was used to examine the differences in baseline patient characteristics between the 2 cohorts. The allelic distribution of polymorphisms was tested for deviation from the Hardy-Weinberg equilibrium using the exact test, linkage disequilibrium among SNPs was assessed using  $D'$  and  $r^2$  values, and haplotype frequencies of the genes were inferred using HaploView version 4.2 (<http://www.broad.mit.edu/mpg/haploview>). Fisher's exact test was applied to examine the associations between SNPs and disease control rate or toxicity. The Kaplan-Meier method and the log-rank test were performed to evaluate the association between candidate SNPs and PFS or OS. The baseline demographic and clinical characteristics that remained statistically significantly associated with PFS and OS in multivariable analyses were included in the final models to reevaluate the independent effect of candidate SNPs. Because the true modes for candidate SNPs were not yet established, the analyses used a codominant, dominant, or recessive genetic model as appropriate. Serum VEGF-A and *CCL5* levels at baseline and at day 21 and level changes during treatment were compared between the genetic variants of candidate SNPs using Student's unpaired  $t$  test and 1-way analysis of variance.

**Supplemental Table 1** Candidate SNPs in *CCL5/CCR5* Pathway

| Gene and rs No.         | Allele Location                       | Base Exchange | MAF (W/JPN) <sup>a</sup> | Function of Polymorphism                                                      | Primer (5'-3')                                       |
|-------------------------|---------------------------------------|---------------|--------------------------|-------------------------------------------------------------------------------|------------------------------------------------------|
| <i>CCL5</i> rs2280789   | Intron<br>Chromosome 17:35879999      | A > G         | 0.11/0.31                | Transcriptional regulation                                                    | F: ATCTCCCAACATGAGTCCA<br>R: CCATATGTCCTGTTGCTTGA    |
| <i>CCL5</i> rs3817655   | Intron<br>Chromosome 17:35872637      | A > T         | 0.15/0.31                | Transcriptional regulation                                                    | F: TGATATCGGGGTAGGGCATA<br>R: GGCGATTAATAATGCACACAA  |
| <i>CCL3</i> rs1130371   | Synonymous<br>Chromosome 17:36089191  | G > A         | 0.31/0.31                | Protein coding, splicing regulation,<br>posttranslational, conserved          | F: GCCTTCCAGGATAGCCTTC<br>R: CTTTGAGACGAGCAGCCAGT    |
| <i>CCL4</i> rs1634517   | Intron<br>Chromosome 17:36105010      | C > A         | 0.33/0.22                | Tagging SNP                                                                   | F: CCGATTCTTAAACCGTGCT<br>R: TTCCACCCACTGGATTAGC     |
| <i>CCR5</i> rs1799988   | 5' prime UTR<br>Chromosome 3:46370768 | C > T         | 0.47/0.48                | Transcriptional regulation                                                    | F: TGGGATGAGCAGAGAACAAA<br>R: GGCGAAAAGAATCAGAGAACA  |
| <i>PRCKD</i> rs1483185  | Intron<br>Chromosome 3:53164998       | T > G         | 0.18/0.13                | Transcriptional regulation                                                    | F: ACAAAATAGTGGTGCCAGGA<br>R: AACAGGCTCTCCCGTCTAC    |
| <i>PRCKD</i> rs2306574  | Synonymous<br>Chromosome 3:53188745   | C > T         | 0.23/0.15                | Protein coding, splicing regulation,<br>transcriptional regulation, conserved | F: GAAGAAATGTCCCCTGCTGA<br>R: TTCTCTTGCACATCCCAAA    |
| <i>KLF13</i> rs2241779  | Intron<br>Chromosome 15:31348049      | C > A         | 0.42/0.42                | Transcriptional regulation                                                    | F: CGTCCAGATCTCAGGCTTC<br>R: TTTCCACTTCTCCACCAG      |
| <i>HIF1A</i> rs12434438 | Intron<br>Chromosome 14:61730580      | A > G         | 0.16/0.23                | Transcriptional regulation                                                    | F: CCTGCACCATGTTAAGCATTT<br>R: CCATGCAAAGGAATGGTAGAA |

Abbreviations: F = forward primer; JPN = Japanese; MAF = minor allele frequency; R = reverse primer; SNP = single nucleotide polymorphism; W = white.

<sup>a</sup>In W and JPN from Ensembl Genome Browser (<http://uswest.ensembl.org/index.html>).

# Gene Polymorphisms as Genetic Biomarker

**Supplemental Table 2** Baseline Patient and Tumor Characteristics

| Characteristic                     | Evaluation Cohort (N = 79) |      | Validation Cohort (N = 150) |      | P                  |
|------------------------------------|----------------------------|------|-----------------------------|------|--------------------|
|                                    | N                          | %    | N                           | %    |                    |
| <b>Sex</b>                         |                            |      |                             |      | .30                |
| Male                               | 37                         | 46.8 | 81                          | 54.0 |                    |
| Female                             | 42                         | 53.2 | 69                          | 46.0 |                    |
| <b>Age (y)</b>                     |                            |      |                             |      |                    |
| Median (range)                     | 62 (34-83)                 |      | 62 (33-81)                  |      | .48                |
| ≤65                                | 48                         | 60.8 | 90                          | 60.0 |                    |
| >65                                | 31                         | 39.2 | 60                          | 40.0 |                    |
| <b>ECOG PS</b>                     |                            |      |                             |      | <.001 <sup>b</sup> |
| 0                                  | 44                         | 55.7 | 117                         | 78.0 |                    |
| 1-2                                | 35                         | 44.3 | 33                          | 22.0 |                    |
| <b>Primary Tumor Site</b>          |                            |      |                             |      | .54                |
| Right                              | 23                         | 29.1 | 49                          | 32.7 |                    |
| Left                               | 56                         | 70.9 | 99                          | 66.0 |                    |
| Unknown <sup>a</sup>               | —                          | —    | 2                           | 1.3  |                    |
| <b>Liver Metastasis</b>            |                            |      |                             |      | .031 <sup>b</sup>  |
| Yes                                | 53                         | 67.1 | 120                         | 80.0 |                    |
| No                                 | 26                         | 32.9 | 30                          | 20.0 |                    |
| <b>Lung Metastasis</b>             |                            |      |                             |      | .026 <sup>b</sup>  |
| Yes                                | 46                         | 58.2 | 109                         | 72.7 |                    |
| No                                 | 33                         | 41.8 | 41                          | 27.3 |                    |
| <b>Lymph Node Metastasis</b>       |                            |      |                             |      | .93                |
| Yes                                | 40                         | 50.6 | 75                          | 50.0 |                    |
| No                                 | 39                         | 49.4 | 75                          | 50.0 |                    |
| <b>Peritoneal Metastasis</b>       |                            |      |                             |      | .59                |
| Yes                                | 20                         | 25.3 | 43                          | 28.7 |                    |
| No                                 | 59                         | 74.7 | 107                         | 71.3 |                    |
| <b>No. of Metastases</b>           |                            |      |                             |      | <.001 <sup>b</sup> |
| 1                                  | 24                         | 30.4 | 16                          | 10.7 |                    |
| >1                                 | 55                         | 69.6 | 134                         | 89.3 |                    |
| <b>Primary Tumor Resected</b>      |                            |      |                             |      | .58                |
| Yes                                | 69                         | 87.3 | 127                         | 84.7 |                    |
| No                                 | 10                         | 12.7 | 23                          | 15.3 |                    |
| <b>History of Adjuvant Therapy</b> |                            |      |                             |      | .19                |
| Yes                                | 26                         | 32.9 | 37                          | 24.7 |                    |
| No                                 | 53                         | 67.1 | 112                         | 74.7 |                    |
| Unknown <sup>a</sup>               | —                          | —    | 1                           | 0.6  |                    |

Abbreviation: ECOG PS = Eastern Cooperative Oncology Group performance status.

<sup>a</sup>Not included in analysis.

<sup>b</sup>Statistically significant ( $P < .05$ ) by  $P$  chi-square test or by Wilcoxon test when appropriate.

Supplemental Table 3 Association of Baseline Characteristics With Clinical Outcome in Evaluation Cohort

| Characteristic                         | N  | Progression-Free Survival |                        |                    | Overall Survival     |                        |                    |
|----------------------------------------|----|---------------------------|------------------------|--------------------|----------------------|------------------------|--------------------|
|                                        |    | Median (95% CI) (mo)      | Univariate HR (95% CI) | P                  | Median (95% CI) (mo) | Univariate HR (95% CI) | P                  |
| <b>Age (y)</b>                         |    |                           |                        | .41                |                      |                        | .87                |
| ≤65                                    | 49 | 2.0 (1.8, 2.5)            | 1 (Reference)          |                    | 8.1 (5.2, 12.0)      | 1 (Reference)          |                    |
| >65                                    | 31 | 2.0 (1.7, 3.3)            | 0.83 (0.52, 1.33)      |                    | 8.7 (5.1, 13.6)      | 0.95 (0.55, 1.66)      |                    |
| <b>Gender</b>                          |    |                           |                        | .12                |                      |                        | .57                |
| Male                                   | 38 | 2.3 (2.0, 3.3)            | 1 (Reference)          |                    | 8.7 (5.1, 13.6)      | 1 (Reference)          |                    |
| Female                                 | 42 | 1.8 (1.7, 2.0)            | 1.40 (0.89, 2.20)      |                    | 8.1 (5.8, 12.6)      | 1.17 (0.68, 2.02)      |                    |
| <b>Primary Tumor Site</b>              |    |                           |                        | .80                |                      |                        | .25                |
| Right                                  | 23 | 2.0 (1.8, 4.2)            | 1 (Reference)          |                    | 12.9 (5.8, 27.2)     | 1 (Reference)          |                    |
| Left                                   | 57 | 2.0 (1.8, 2.5)            | 1.06 (0.65, 1.74)      |                    | 7.8 (5.1, 10.8)      | 1.44 (0.77, 2.70)      |                    |
| <b>Primary Tumor Resected</b>          |    |                           |                        | .85                |                      |                        | .030 <sup>a</sup>  |
| Yes                                    | 70 | 2.0 (1.8, 2.3)            | 1 (Reference)          |                    | 10.3 (6.5, 12.9)     | 1 (Reference)          |                    |
| No                                     | 10 | 3.0 (1.7, 4.5)            | 0.94 (0.48, 1.84)      |                    | 4.9 (2.8, 7.9)       | 2.16 (1.04, 4.46)      |                    |
| <b>Adjuvant Treatment</b>              |    |                           |                        | .94                |                      |                        | .21                |
| Yes                                    | 27 | 2.3 (1.8, 4.5)            | 1 (Reference)          |                    | 12.0 (7.6, 15.3)     | 1 (Reference)          |                    |
| No                                     | 53 | 2.0 (1.8, 2.7)            | 0.98 (0.61, 1.58)      |                    | 6.3 (4.6, 9.6)       | 1.44 (0.81, 2.57)      |                    |
| <b>Histology</b>                       |    |                           |                        | .12                |                      |                        | .19                |
| Moderate to poor                       | 62 | 1.8 (1.8, 2.3)            | 1 (Reference)          |                    | 8.1 (5.8, 11.8)      | 1 (Reference)          |                    |
| Well                                   | 17 | 3.2 (2.0, 6.2)            | 0.66 (0.39, 1.14)      |                    | 13.6 (4.6, 27.7)     | 0.63 (0.31, 1.28)      |                    |
| <b>Liver Metastasis</b>                |    |                           |                        | <.001 <sup>a</sup> |                      |                        | <.001 <sup>a</sup> |
| Yes                                    | 54 | 1.9 (1.8, 2.3)            | 1 (Reference)          |                    | 6.1 (4.6, 8.7)       | 1 (Reference)          |                    |
| No                                     | 26 | 4.1 (1.8, 6.6)            | 0.45 (0.26, 0.76)      |                    | 13.9 (10.8, 29.9)    | 0.34 (0.18, 0.65)      |                    |
| <b>Lung Metastasis</b>                 |    |                           |                        | .35                |                      |                        | .22                |
| Yes                                    | 47 | 2.0 (1.8, 3.2)            | 1 (Reference)          |                    | 10.8 (5.9, 15.3)     | 1 (Reference)          |                    |
| No                                     | 33 | 2.0 (1.7, 2.5)            | 1.23 (0.78, 1.94)      |                    | 7.6 (4.6, 11.8)      | 1.40 (0.81, 2.39)      |                    |
| <b>Lymph Node Metastasis</b>           |    |                           |                        | .079               |                      |                        | .017 <sup>a</sup>  |
| Yes                                    | 41 | 1.9 (1.7, 2.3)            | 1 (Reference)          |                    | 6.3 (4.1, 8.1)       | 1 (Reference)          |                    |
| No                                     | 39 | 3.0 (1.8, 4.5)            | 0.69 (0.44, 1.07)      |                    | 12.9 (7.6, 15.5)     | 0.52 (0.30, 0.90)      |                    |
| <b>Peritoneal Involved</b>             |    |                           |                        | .63                |                      |                        | .86                |
| Yes                                    | 20 | 1.8 (1.3, 4.5)            | 1 (Reference)          |                    | 9.4 (4.0, 12.9)      | 1 (Reference)          |                    |
| No                                     | 60 | 2.2 (1.8, 2.7)            | 0.88 (0.53, 1.48)      |                    | 7.9 (5.9, 12.6)      | 0.95 (0.52, 1.72)      |                    |
| <b>No. of Metastases</b>               |    |                           |                        | .005 <sup>a</sup>  |                      |                        | .043 <sup>a</sup>  |
| 1                                      | 24 | 3.8 (1.8, 4.8)            | 1 (Reference)          |                    | 12.6 (7.6, 27.2)     | 1 (Reference)          |                    |
| >1                                     | 56 | 1.9 (1.8, 2.3)            | 1.91 (1.16, 3.16)      |                    | 6.5 (4.6, 10.8)      | 1.84 (1.00, 3.41)      |                    |
| <b>No. of Prior Treatment Regimens</b> |    |                           |                        | .75                |                      |                        | .20                |
| <3                                     | 24 | 2.0 (1.6, 2.7)            | 1 (Reference)          |                    | 12.6 (5.0, 29.9)     | 1 (Reference)          |                    |
| ≥3                                     | 56 | 2.2 (1.8, 3.0)            | 1.08 (0.66, 1.77)      |                    | 7.6 (5.2, 10.8)      | 1.49 (0.80, 2.80)      |                    |
| <b>ECOG PS</b>                         |    |                           |                        | .84                |                      |                        | .30                |
| 0                                      | 45 | 2.3 (1.8, 3.2)            | 1 (Reference)          |                    | 9.6 (6.3, 12.9)      | 1 (Reference)          |                    |
| 1                                      | 35 | 1.8 (1.7, 2.7)            | 1.05 (0.67, 1.64)      |                    | 7.6 (4.0, 12.9)      | 1.33 (0.77, 2.28)      |                    |

## Gene Polymorphisms as Genetic Biomarker

**Supplemental Table 3** Continued

| Characteristic | N  | Progression-Free Survival |                        |     | Overall Survival     |                        |     |
|----------------|----|---------------------------|------------------------|-----|----------------------|------------------------|-----|
|                |    | Median (95% CI) (mo)      | Univariate HR (95% CI) | P   | Median (95% CI) (mo) | Univariate HR (95% CI) | P   |
| <b>KRAS</b>    |    |                           |                        | .26 |                      |                        | .11 |
| Wild type      | 50 | 2.0 (1.8, 2.5)            | 1 (Reference)          |     | 7.6 (5.8, 10.3)      | 1 (Reference)          |     |
| Mutant         | 28 | 2.0 (1.7, 3.0)            | 0.77 (0.48, 1.25)      |     | 13.6 (3.7, 29.9)     | 0.61 (0.33, 1.14)      |     |

Abbreviations: CI = confidence interval; ECOG PS = Eastern Cooperative Oncology Group performance status; HR = hazard ratio.

<sup>a</sup>Statistically significant ( $P < .05$ ) by log-rank test for progression-free survival and overall survival in univariate analysis.

Supplemental Table 4 Association of Baseline Characteristics With Clinical Outcome in Validation Cohort

| Characteristic                                              | N   | Progression-Free Survival |                        |                    | Overall Survival     |                        |                    |
|-------------------------------------------------------------|-----|---------------------------|------------------------|--------------------|----------------------|------------------------|--------------------|
|                                                             |     | Median (95% CI) (mo)      | Univariate HR (95% CI) | P                  | Median (95% CI) (mo) | Univariate HR (95% CI) | P                  |
| <b>Age (y)</b>                                              |     |                           |                        | .17                |                      |                        | .42                |
| ≤65                                                         | 90  | 2.0 (1.8, 2.3)            | 1 (Reference)          |                    | 6.4 (5.4, 8.8)       | 1 (Reference)          |                    |
| >65                                                         | 60  | 2.2 (1.8, 3.4)            | 0.80 (0.57, 1.12)      |                    | 5.9 (4.0, 9.5)       | 0.87 (0.62, 1.23)      |                    |
| <b>Gender</b>                                               |     |                           |                        | .067               |                      |                        | .22                |
| Male                                                        | 81  | 2.3 (2.0, 3.4)            | 1 (Reference)          |                    | 7.8 (5.4, 9.6)       | 1 (Reference)          |                    |
| Female                                                      | 69  | 1.9 (1.8, 2.1)            | 1.34 (0.97, 1.86)      |                    | 5.8 (4.1, 7.6)       | 1.23 (0.88, 1.73)      |                    |
| <b>Time to Regorafenib Initiation (mo)</b>                  |     |                           |                        | .039 <sup>a</sup>  |                      |                        | .37                |
| <18                                                         | 20  | 1.8 (0.9, 2.0)            | 1 (Reference)          |                    | 3.9 (1.7, 7.8)       | 1 (Reference)          |                    |
| ≥18                                                         | 130 | 2.1 (1.9, 2.7)            | 0.62 (0.37, 1.01)      |                    | 6.5 (5.6, 8.7)       | 0.79 (0.48, 1.32)      |                    |
| <b>Primary Tumor Site</b>                                   |     |                           |                        | .10                |                      |                        | .21                |
| Right                                                       | 49  | 1.9 (1.7, 2.1)            | 1 (Reference)          |                    | 4.7 (3.5, 7.1)       | 1 (Reference)          |                    |
| Left                                                        | 54  | 1.9 (1.8, 2.8)            | 1.11 (0.74, 1.67)      |                    | 5.6 (3.5, 8.8)       | 1.19 (0.79, 1.79)      |                    |
| Rectum                                                      | 45  | 2.7 (2.1, 4.1)            | 0.74 (0.49, 1.11)      |                    | 9.1 (6.5, 10.7)      | 0.83 (0.54, 1.27)      |                    |
| <b>Primary Tumor Resected</b>                               |     |                           |                        | .21                |                      |                        | .008 <sup>a</sup>  |
| Yes                                                         | 127 | 2.1 (1.9, 2.3)            | 1 (Reference)          |                    | 7.0 (5.6, 8.7)       | 1 (Reference)          |                    |
| No                                                          | 23  | 2.1 (1.8, 2.3)            | 1.32 (0.84, 2.06)      |                    | 3.7 (2.4, 6.0)       | 1.81 (1.14, 2.86)      |                    |
| <b>Adjuvant Treatment</b>                                   |     |                           |                        | .23                |                      |                        | .49                |
| Yes                                                         | 37  | 2.8 (1.9, 4.1)            | 1 (Reference)          |                    | 6.3 (4.3, 10.6)      | 1 (Reference)          |                    |
| No                                                          | 112 | 2.0 (1.8, 2.2)            | 1.25 (0.86, 1.83)      |                    | 6.2 (5.1, 7.9)       | 1.15 (0.77, 1.73)      |                    |
| <b>Synchronous</b>                                          |     |                           |                        | .42                |                      |                        | .22                |
| Yes                                                         | 101 | 2.0 (1.8, 2.2)            | 1 (Reference)          |                    | 6.0 (4.7, 8.0)       | 1 (Reference)          |                    |
| No                                                          | 49  | 2.3 (1.9, 3.1)            | 0.87 (0.62, 1.23)      |                    | 6.3 (4.4, 10.2)      | 0.80 (0.56, 1.16)      |                    |
| <b>Liver Metastasis</b>                                     |     |                           |                        | .064               |                      |                        | .008 <sup>a</sup>  |
| Yes                                                         | 120 | 2.0 (1.8, 2.2)            | 1 (Reference)          |                    | 5.6 (4.4, 7.8)       | 1 (Reference)          |                    |
| No                                                          | 30  | 2.4 (2.0, 4.7)            | 0.69 (0.46, 1.04)      |                    | 10.1 (6.3, 12.5)     | 0.57 (0.37, 0.89)      |                    |
| <b>Lung Metastasis</b>                                      |     |                           |                        | .99                |                      |                        | .56                |
| Yes                                                         | 109 | 2.1 (1.9, 2.7)            | 1 (Reference)          |                    | 7.0 (5.6, 8.8)       | 1 (Reference)          |                    |
| No                                                          | 41  | 1.8 (1.7, 2.3)            | 1.00 (0.68, 1.46)      |                    | 4.3 (2.6, 9.6)       | 1.12 (0.76, 1.63)      |                    |
| <b>Lymph Node Metastasis</b>                                |     |                           |                        | .12                |                      |                        | .11                |
| Yes                                                         | 75  | 1.9 (1.8, 2.2)            | 1 (Reference)          |                    | 5.4 (3.5, 7.8)       | 1 (Reference)          |                    |
| No                                                          | 75  | 2.3 (2.0, 3.4)            | 0.78 (0.56, 1.08)      |                    | 7.6 (5.8, 9.6)       | 0.76 (0.54, 1.07)      |                    |
| <b>Peritoneum Involved</b>                                  |     |                           |                        | .012 <sup>a</sup>  |                      |                        | .11                |
| Yes                                                         | 43  | 1.9 (1.8, 2.2)            | 1 (Reference)          |                    | 5.1 (2.6, 7.8)       | 1 (Reference)          |                    |
| No                                                          | 107 | 2.2 (1.9, 2.8)            | 0.64 (0.45, 0.92)      |                    | 6.5 (5.5, 9.1)       | 0.74 (0.51, 1.08)      |                    |
| <b>No. of Metastasis Sites</b>                              |     |                           |                        | .26                |                      |                        | .17                |
| 1                                                           | 16  | 2.3 (1.8, 4.7)            | 1 (Reference)          |                    | 6.4 (3.5, 21.2)      | 1 (Reference)          |                    |
| >1                                                          | 134 | 2.1 (1.8, 2.2)            | 1.35 (0.79, 2.30)      |                    | 6.0 (5.3, 8.0)       | 1.43 (0.82, 2.49)      |                    |
| <b>No. of Treatment Lines Before Regorafenib Initiation</b> |     |                           |                        | .74                |                      |                        | .37                |
| ≤3                                                          | 108 | 2.1 (1.9, 2.3)            | 1 (Reference)          |                    | 6.5 (5.7, 8.7)       | 1 (Reference)          |                    |
| >3                                                          | 42  | 2.0 (1.8, 2.7)            | 1.06 (0.74, 1.52)      |                    | 5.2 (3.3, 9.0)       | 1.19 (0.81, 1.73)      |                    |
| <b>Kohne Score</b>                                          |     |                           |                        | <.001 <sup>a</sup> |                      |                        | <.001 <sup>a</sup> |
| Low to intermediate                                         | 119 | 2.2 (2.0, 2.8)            | 1 (Reference)          |                    | 8.0 (6.0, 9.6)       | 1 (Reference)          |                    |
| High                                                        | 31  | 1.6 (0.9, 1.8)            | 2.22 (1.48, 3.33)      |                    | 2.6 (1.8, 3.5)       | 3.17 (2.06, 4.88)      |                    |

# Gene Polymorphisms as Genetic Biomarker

**Supplemental Table 4** Continued

| Characteristic    | N   | Progression-Free Survival |                        |                    | Overall Survival     |                        |                    |
|-------------------|-----|---------------------------|------------------------|--------------------|----------------------|------------------------|--------------------|
|                   |     | Median (95% CI) (mo)      | Univariate HR (95% CI) | P                  | Median (95% CI) (mo) | Univariate HR (95% CI) | P                  |
| <b>ECOG PS</b>    |     |                           |                        | <.001 <sup>a</sup> |                      |                        | <.001 <sup>a</sup> |
| 0                 | 117 | 2.2 (2.0, 2.8)            | 1 (Reference)          |                    | 7.9 (6.0, 9.5)       | 1 (Reference)          |                    |
| 1-2               | 33  | 1.7 (1.0, 2.1)            | 2.11 (1.41, 3.15)      |                    | 3.1 (2.0, 4.0)       | 2.46 (1.62, 3.75)      |                    |
| <b>RAS Status</b> |     |                           |                        | .12                |                      |                        | .31                |
| Wild type         | 52  | 2.4 (1.8, 3.7)            | 1 (Reference)          |                    | 7.0 (5.4, 8.9)       | 1 (Reference)          |                    |
| Mutant            | 93  | 2.1 (1.8, 2.3)            | 1.30 (0.92, 1.84)      |                    | 5.9 (4.4, 8.7)       | 1.20 (0.84, 1.72)      |                    |

Abbreviations: CI = confidence interval; ECOG PS = Eastern Cooperative Oncology Group performance status; HR = hazard ratio.

<sup>a</sup>Statistically significant ( $P < .05$ ) by log-rank test for progression-free survival and overall survival in univariate analysis.

**Supplemental Table 5 Association Between Gene Polymorphism and Clinical Outcome**

| Characteristic           | N  | Disease Control |          |      | Progression-Free Survival |                        |                   |                           |                  | Overall Survival     |                        |                   |                           |   |
|--------------------------|----|-----------------|----------|------|---------------------------|------------------------|-------------------|---------------------------|------------------|----------------------|------------------------|-------------------|---------------------------|---|
|                          |    | PR + SD         | PD       | P    | Median (95% CI) (mo)      | Univariate HR (95% CI) | P                 | Multivariable HR (95% CI) | P                | Median (95% CI) (mo) | Univariate HR (95% CI) | P                 | Multivariable HR (95% CI) | P |
| <b>Evaluation Cohort</b> |    |                 |          |      |                           |                        |                   |                           |                  |                      |                        |                   |                           |   |
| <i>PRKCD</i> rs1483185   |    |                 |          | .17  |                           |                        |                   | .11 (.60)                 |                  |                      | .59                    |                   | .076 (.51)                |   |
| G/G                      | 55 | 24 (53%)        | 21 (47%) |      | 2.0 (1.8, 2.7)            | 1 (Reference)          | 1 (Reference)     |                           | 8.1 (6.1, 12.6)  | 1 (Reference)        |                        | 1 (Reference)     |                           |   |
| G/T <sup>a</sup>         | 22 | 6 (33%)         | 12 (67%) |      | 2.3 (1.8, 3.3)            | 0.81 (0.49, 1.34)      | 0.66 (0.40, 1.10) |                           | 12.0 (5.1, 15.3) | 0.85 (0.46, 1.56)    |                        | 0.56 (0.29, 1.06) |                           |   |
| T/T <sup>a</sup>         | 1  | 1 (100%)        | 0        |      |                           |                        |                   |                           |                  |                      |                        |                   |                           |   |
| <i>PRKCD</i> rs2306574   |    |                 |          | 1.00 |                           |                        |                   | .72 (1.00)                |                  |                      | .15                    |                   | .71 (1.00)                |   |
| T/T                      | 56 | 23 (49%)        | 24 (51%) |      | 2.0 (1.8, 3.2)            | 1 (Reference)          | 1 (Reference)     |                           | 9.6 (6.1, 13.6)  | 1 (Reference)        |                        | 1 (Reference)     |                           |   |
| T/C                      | 22 | 8 (47%)         | 9 (53%)  |      | 1.9 (1.7, 2.7)            | 1.30 (0.78, 2.15)      | 0.91 (0.53, 1.55) |                           | 6.5 (3.6, 12.0)  | 1.52 (0.85, 2.70)    |                        | 0.89 (0.47, 1.68) |                           |   |
| <i>HIF1A</i> rs12434438  |    |                 |          | .20  |                           |                        |                   | .47 (.89)                 |                  |                      | .96                    |                   | .72 (1.00)                |   |
| A/A                      | 51 | 18 (43%)        | 24 (57%) |      | 2.0 (1.8, 3.0)            | 1 (Reference)          | 1 (Reference)     |                           | 7.6 (5.8, 12.9)  | 1 (Reference)        |                        | 1 (Reference)     |                           |   |
| A/G <sup>a</sup>         | 23 | 12 (67%)        | 6 (33%)  |      | 2.0 (1.6, 3.3)            | 1.22 (0.75, 1.99)      | 1.20 (0.73, 1.96) |                           | 8.7 (5.0, 15.5)  | 0.99 (0.55, 1.77)    |                        | 0.90 (0.49, 1.63) |                           |   |
| G/G <sup>a</sup>         | 4  | 1 (25%)         | 3 (75%)  |      |                           |                        |                   |                           |                  |                      |                        |                   |                           |   |
| <b>Validation Cohort</b> |    |                 |          |      |                           |                        |                   |                           |                  |                      |                        |                   |                           |   |
| <i>HIF1A</i> rs12434438  |    |                 |          | .22  |                           |                        |                   | .66 (1.00)                |                  |                      | .40                    |                   | .69 (1.00)                |   |
| A/A                      | 71 | 29 (42%)        | 40 (58%) |      | 2.3 (2.0, 3.1)            | 1 (Reference)          | 1 (Reference)     |                           | 7.0 (5.4, 9.1)   | 1 (Reference)        |                        | 1 (Reference)     |                           |   |
| A/G                      | 60 | 15 (27%)        | 40 (73%) |      | 1.9 (1.7, 2.1)            | 1.43 (1.01, 2.03)      | 1.18 (0.81, 1.71) |                           | 5.4 (2.9, 7.8)   | 1.24 (0.87, 1.77)    |                        | 1.01 (0.69, 1.48) |                           |   |
| G/G                      | 19 | 6 (32%)         | 13 (68%) |      | 1.9 (1.7, 3.9)            | 1.15 (0.69, 1.92)      | 1.00 (0.60, 1.69) |                           | 8.7 (4.5, 13.9)  | 0.93 (0.53, 1.63)    |                        | 0.79 (0.45, 1.40) |                           |   |
|                          |    |                 |          | .11  |                           |                        |                   | .49 (.61)                 |                  |                      | .38                    |                   | .78 (1.00)                |   |
| A/A                      | 71 | 29 (42%)        | 40 (58%) |      | 2.3 (2.0, 3.1)            | 1 (Reference)          | 1 (Reference)     |                           | 7.0 (5.4, 9.1)   | 1 (Reference)        |                        | 1 (Reference)     |                           |   |
| Any G                    | 79 | 21 (28%)        | 53 (72%) |      | 1.9 (1.8, 2.1)            | 1.35 (0.98, 1.87)      | 1.13 (0.80, 1.59) |                           | 5.7 (4.0, 7.8)   | 1.16 (0.83, 1.62)    |                        | 0.95 (0.66, 1.36) |                           |   |

Abbreviations: CI = confidence interval; ECOG PS = Eastern Cooperative Oncology Group performance status; HR = hazard ratio; PD = progressive disease; PR = partial response; SD = stable disease.

<sup>a</sup>Grouped together for estimate of HR.

<sup>b</sup>Statistically significant ( $P < .05$ ).  $P$  values after  $p$ -act multiple testing adjustment are shown in parentheses.  $P$  was based on Fisher's exact test for response, log-rank test in univariate analysis, and Wald test in multivariable analysis within Cox regression model adjusted for liver metastasis and lymph node metastasis in evaluation cohort; and for time to regorafenib initiation ( $< 18$  vs.  $\geq 18$  months), ECOG PS (0 vs. 1 or 2), primary tumor resection (yes vs. no), and Kohne score (low-intermediate vs. high) in validation cohort.



| Supplemental Table 6 Association Between Toxicities and Clinical Outcome |     |                           |                   |                   |                      |                   |                   |
|--------------------------------------------------------------------------|-----|---------------------------|-------------------|-------------------|----------------------|-------------------|-------------------|
| Characteristic                                                           | N   | Progression-Free Survival |                   |                   | Overall Survival     |                   |                   |
|                                                                          |     | Median (mo) (95% CI)      | HR (95% CI)       | P                 | Median (mo) (95% CI) | HR (95% CI)       | P                 |
| <b>Evaluation Cohort</b>                                                 |     |                           |                   |                   |                      |                   |                   |
| HFSR                                                                     |     |                           |                   | .24               |                      |                   | .80               |
| <3                                                                       | 53  | 1.8 (1.6, 2.7)            | 1 (Reference)     |                   | 8.1 (5.8, 12.6)      | 1 (Reference)     |                   |
| ≥3                                                                       | 26  | 2.3 (1.8, 3.2)            | 0.76 (0.48, 1.22) |                   | 10.8 (5.0, 13.9)     | 0.93 (0.53, 1.63) |                   |
| Hypertension                                                             |     |                           |                   | .042 <sup>a</sup> |                      |                   | .090              |
| <3                                                                       | 72  | 2.0 (1.8, 2.4)            | 1 (Reference)     |                   | 7.6 (5.8, 10.8)      | 1 (Reference)     |                   |
| ≥3                                                                       | 7   | 4.8 (1.3, 12.0)           | 0.45 (0.19, 1.03) |                   | 13.9 (8.7, 26.7)     | 0.43 (0.16, 1.20) |                   |
| Rash                                                                     |     |                           |                   | .035 <sup>a</sup> |                      |                   | .016 <sup>a</sup> |
| <3                                                                       | 69  | 1.8 (0.5, 2.3)            | 1 (Reference)     |                   | 5.2 (1.5, 8.7)       | 1 (Reference)     |                   |
| ≥3                                                                       | 10  | 2.2 (1.8, 2.7)            | 0.51 (0.25, 1.01) |                   | 9.6 (6.3, 12.9)      | 0.43 (0.20, 0.90) |                   |
| Diarrhea                                                                 |     |                           |                   | .71               |                      |                   | .92               |
| <3                                                                       | 77  | 2.5 (0.5, 4.5)            | 1 (Reference)     |                   | 5.2 (3.6, 14.5)      | 1 (Reference)     |                   |
| ≥3                                                                       | 3   | 2.0 (1.8, 2.7)            | 0.81 (0.25, 2.58) |                   | 8.7 (6.3, 12.0)      | 0.93 (0.23, 3.83) |                   |
| AST/ALT                                                                  |     |                           |                   | .059              |                      |                   | .048 <sup>a</sup> |
| <3                                                                       | 75  | 2.2 (1.8, 2.7)            | 1 (Reference)     |                   | 8.7 (6.3, 12.6)      | 1 (Reference)     |                   |
| ≥3                                                                       | 4   | 1.5 (1.1, 2.0)            | 2.48 (0.87, 7.08) |                   | 5.1 (1.9, 9.6)       | 2.66 (0.94, 7.55) |                   |
| <b>Validation Cohort</b>                                                 |     |                           |                   |                   |                      |                   |                   |
| HFSR                                                                     |     |                           |                   | .035 <sup>a</sup> |                      |                   | .096              |
| <3                                                                       | 126 | 1.9 (1.8, 2.2)            | 1 (Reference)     |                   | 5.9 (5.0, 7.8)       | 1 (Reference)     |                   |
| ≥3                                                                       | 24  | 4.0 (2.1, 5.8)            | 0.64 (0.41, 0.99) |                   | 11.6 (4.4, 13.9)     | 0.67 (0.41, 1.09) |                   |
| Hypertension                                                             |     |                           |                   | .004 <sup>a</sup> |                      |                   | .15               |
| <3                                                                       | 114 | 2.0 (1.8, 2.2)            | 1 (Reference)     |                   | 5.9 (4.7, 7.8)       | 1 (Reference)     |                   |
| ≥3                                                                       | 36  | 3.9 (1.8, 5.3)            | 0.59 (0.40, 0.88) |                   | 9.2 (4.5, 12.5)      | 0.75 (0.50, 1.11) |                   |
| Rash                                                                     |     |                           |                   | .074              |                      |                   | .034 <sup>a</sup> |
| <3                                                                       | 128 | 2.0 (1.8, 2.2)            | 1 (Reference)     |                   | 5.8 (4.5, 7.6)       | 1 (Reference)     |                   |
| ≥3                                                                       | 22  | 2.5 (1.8, 4.2)            | 0.68 (0.42, 1.08) |                   | 9.9 (5.1, 18.8)      | 0.62 (0.38, 0.99) |                   |
| Diarrhea                                                                 |     |                           |                   | .36               |                      |                   | .47               |
| <3                                                                       | 139 | 2.1 (1.8, 2.3)            | 1 (Reference)     |                   | 5.9 (5.0, 7.8)       | 1 (Reference)     |                   |
| ≥3                                                                       | 11  | 3.7 (2.0, 4.3)            | 0.76 (0.41, 1.40) |                   | 10.6 (4.5, 12.5)     | 0.79 (0.41, 1.51) |                   |
| AST/ALT                                                                  |     |                           |                   | .41               |                      |                   | .16               |
| <3                                                                       | 140 | 2.1 (1.9, 2.3)            | 1 (Reference)     |                   | 6.5 (5.5, 8.7)       | 1 (Reference)     |                   |
| ≥3                                                                       | 10  | 1.8 (0.9, 2.3)            | 1.30 (0.68, 2.50) |                   | 4.4 (1.0, 8.0)       | 1.65 (0.80, 3.42) |                   |

Abbreviations: ALT = alanine aminotransferase; AST = aspartate aminotransferase; CI = confidence interval; HFSR = hand-foot skin reaction; HR = hazard ratio.

<sup>a</sup>Statistically significant ( $P < .05$ ) by log-rank test in univariate analysis.
